# Supplementary material for: A Case Series Describing the Recurrence of COVID-19 in Patients Who Recovered from Initial Illness in Bangladesh
Source: PubMed Central journal article supplement (PMC8103235; doi:10.3390/tropicalmed6020041), 2021-03-31
Supplement: tropicalmed-06-00041-s001.pdf [file tropicalmed-06-00041-s001.pdf]

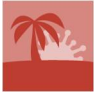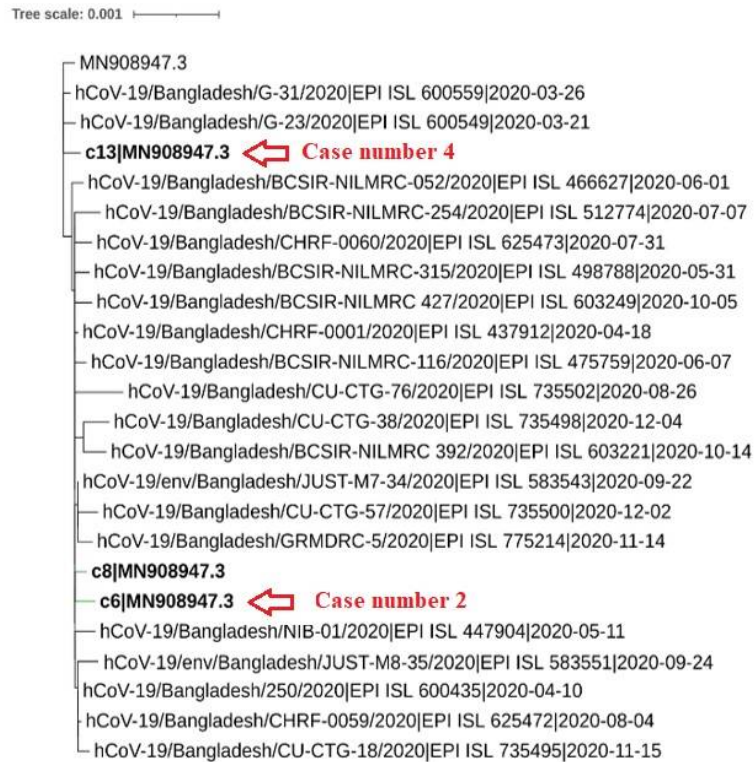

**Figure S1.** Phylogenetic tree based on the SARS-CoV-2 genome, demonstrated homology between the icddr,b SARS-CoV-2 genomes (case number 2 and 4) and other reported SARS-CoV-2 genomes from Bangladesh retrieved from the GISAID database.
